# Supplementary material
Source: publisher site journal article supplement (https://www.dovepress.com/article/311696)
Supplement: Supplementary file 1 [file get_supplementary_file.php]

**Hormone-replacement therapy may be associated with increased incidence of luminal breast cancer: Results from a large-scale HMO analysis**

Vered Rosenberg, Avital Bareket-Samish, Gabriel Chodick and Nava Siegelmann-Danieli

**Corresponding Author:** Dr. Nava Siegelmann-Danieli, Phone: +972-3-7462527; Fax: +972-3-7952779; email: danieli_na@mac.org.il

**Online Resource 1**

**Tables S1.** Breast cancer subtypes as defined in the current study.

| Tumor type | Anti-hormonal therapy  (anastrozole, exemestane, letrozole, tamoxifen) | Anti-HER2 therapy (pertuzumab, trastuzumab) | Chemotherapy |
| --- | --- | --- | --- |
| Luminal A & B without HER2 overexpression  (HR+ and HER2-) | Yes | None | Yes/ None |
| Luminal B with HER2 overexpression  (HR+ and HER2+) | Yes | Yes | Yes |
| Hormone-receptor negative HER2-enriched  (HR- and HER2+) | None | Yes | Yes |
| Triple negative  (HR- and HER2-) | None | None | Yes |
| Unknown | None | None | None |

**Table S2.** Distribution of invasive breast cancer subtypes by age groups 2007-2014 (n=7771)

|  | <45  (n=1553, 100%) | ≥45  (n=6218, 100%) | All age groups (n=7771, 100%) |
| --- | --- | --- | --- |
| Luminal A & B without HER2 overexpression  (HR+ and HER2-) | 869 (56.%) | 4548 (73.1%) | 5417 (69.7%) |
| Luminal B with HER2 overexpression  (HR+ and HER2+) | 215 (13.8%) | 480 (7.7%) | 695 (8.9%) |
| Hormone-receptor negative HER2-enriched  (HR- and HER2+) | 119 (7.7%) | 302 (4.9%) | 421 (5.4%) |
| Triple-negative  (HR- and HER2-) | 260 (16.7%) | 514 (8.3%) | 774 (10.0%) |
| Unknown | 90 (5.8%) | 374 (6.%) | 464 (6.0%) |

**Supplementary Figures**

**
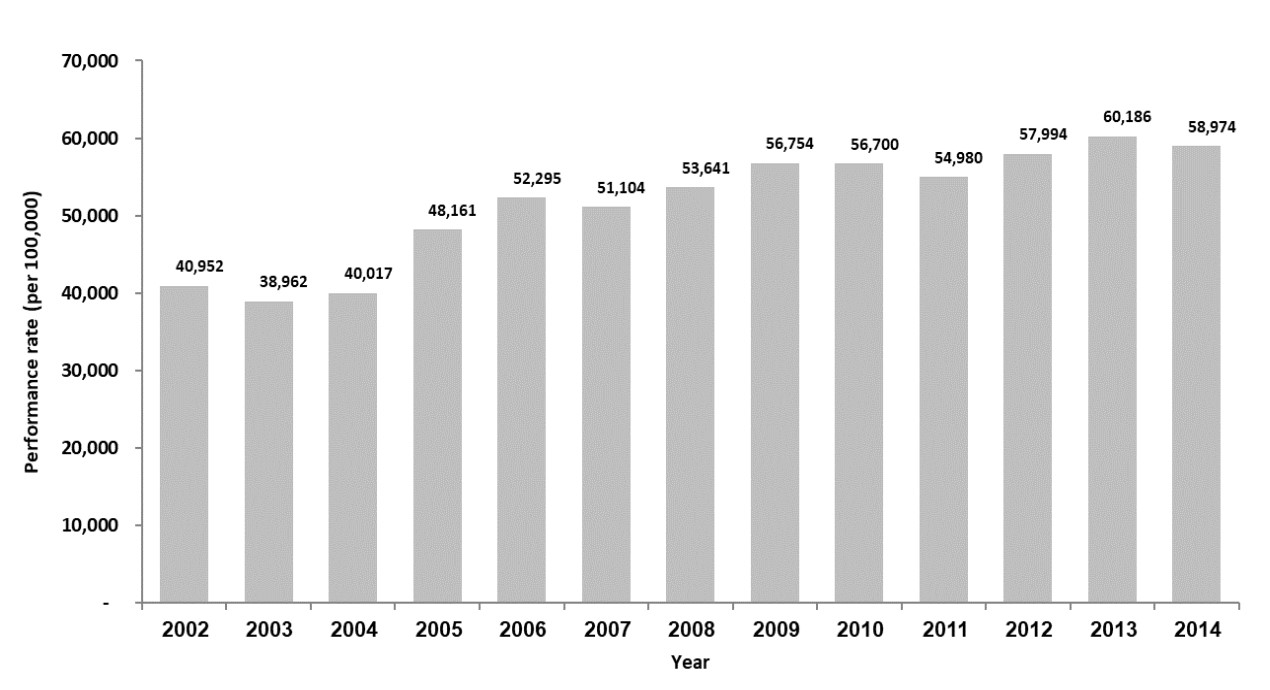
**

**Fig. S1.** Mammography testing rates in Maccabi Healthcare Services (MHS) members ≥45 years of age.


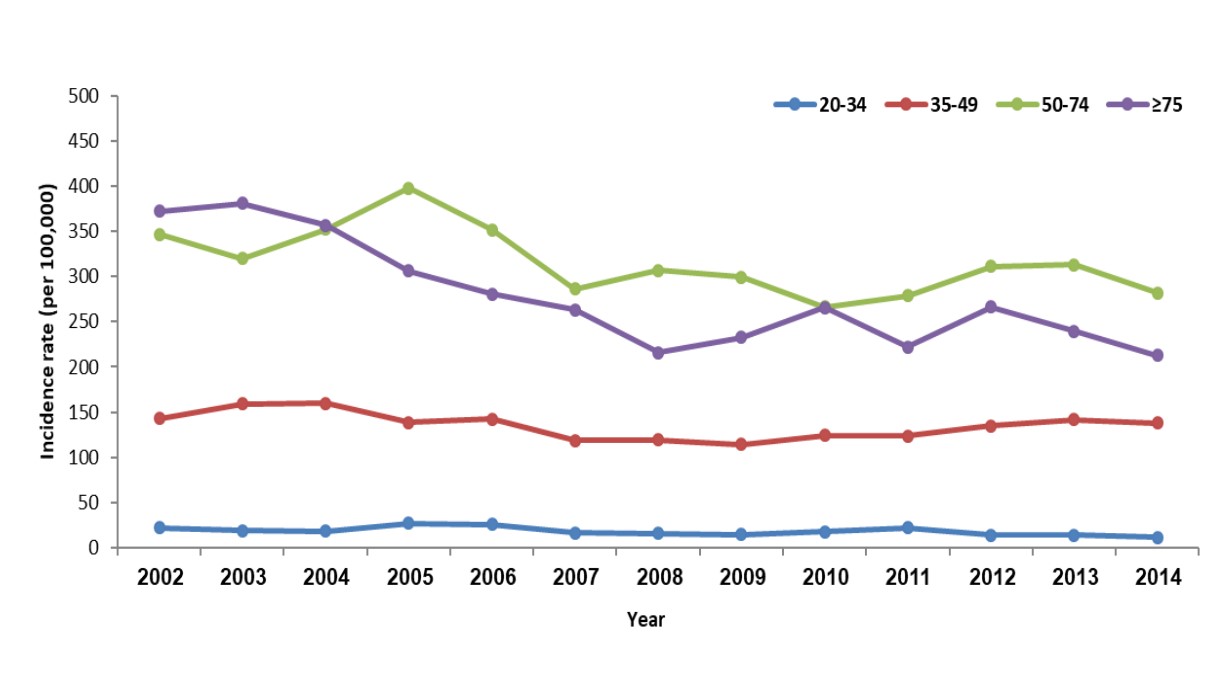


**A**. Age-specific incidence rates for invasive breast cancer.

**
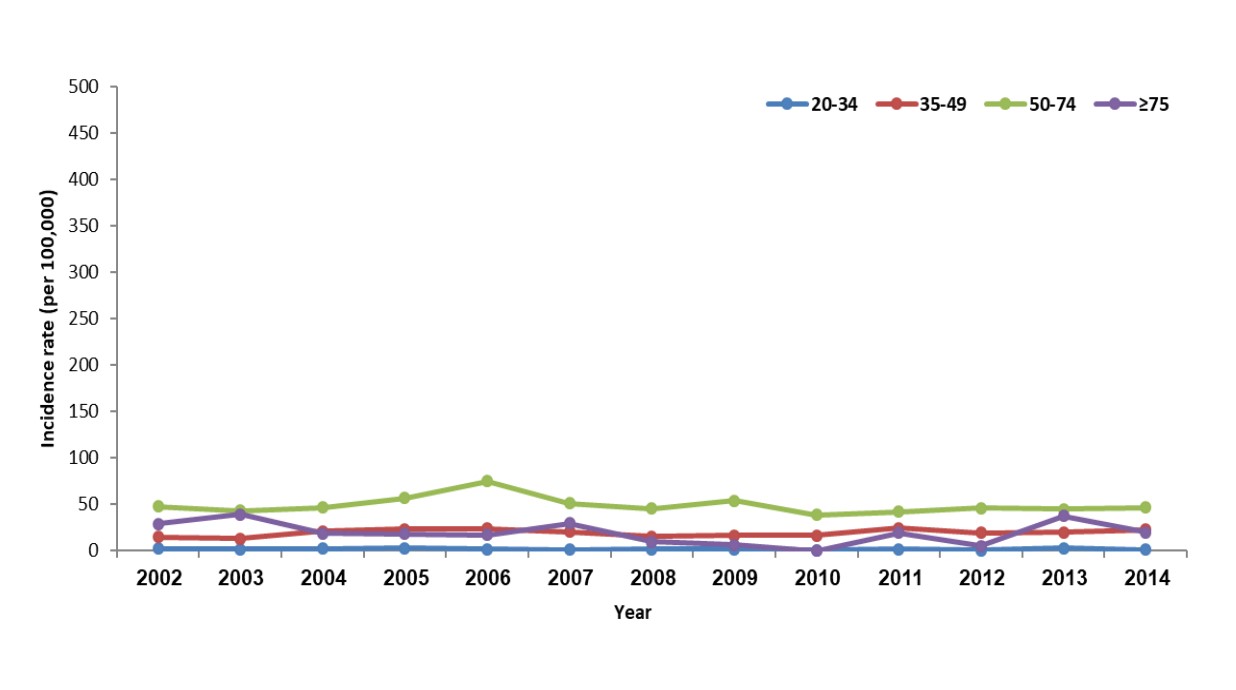
**

1. Age-specific incidence rates for in situ breast cancer.

**Fig. S2.** Breast cancer incidence over time.
